# Supplementary material for: Prevalence of Toxoplasma gondii Measured by Western Blot, ELISA and DNA Analysis, by PCR, in Cats of Western Mexico
Source: MDPI journal article supplement (doi:10.3390/pathogens11010109), 2022-01-17
Supplement: s1 [file s1]

Supplementary information.

Confirmation by DNA sequencing of the *Bl* gene of *Toxoplasma gondii*.

Sample 21/10-222.

```
AAAAATGTGGGAATGAAAGAGACGCTAATGTGTTTGCATAGGTTGCAGTCACTGACGAGCT
CCCCTCTGCTGGCGAAAAGTGAAATTCATGAGTATCTGTGCAACTTTGGTGTATTCGCAGAT
TGGTCGCCTGCTATCGATAGTTGACCACGAACGCTTTAAAGCACAGGAGAAGAAGATCGTG
AAAGAATACGAGAAGAGGTACACAGAGATAGAAGTCGCTGTGGAGACAGCGAAGACTGC
GGGTGACTTCACTCCCGTCGCACCTGCAGCAGAGGAGTGCCGGGCAAGAAAATGAGATGC
CTAGAGGAGACACAGCGTGTTATGAACAAATCTATTGAGGTTTCGCGAAGAGGAGGGAAC
ATATTATATACAGAAGAAGAACAAGAGACGTGCCGCATGTCGCTAAGCCATCGGAAGGGA
TGCTCAGAAAATGGCACAGTATCACATTACAGTTCGGTTGATTTCGT
```

Sample 24/10-223

```
AAAAATGTGGGAATGAAAGAGACGCTAATGTGTTTGCATAGGTTGCAGTCACTGACGAGCT
CCCCTCTGCTGGCGAAAAGTGAAATTCATGAGTATCTGTGCAACTTTGGTGTATTCGCAGAT
TGGTCGCCTGCTATCGATAGTTGACCACGTACGCTTTAAAGCACAGGAGAAGAAGATCGTC
AAAGAATACGAGAAGAGGTACACAGAGATAGAAGTCGCTGTGGAGACAGCGAAGACTGC
GGGTGACTTCACTCCCGTCGCACCTGCAGCAGAGGAGTGCCGGGCAAGAAAATGATATGC
CTAGAGGAGACACAGCGTGTTATGAACAATTCTATTGAGGTTTCGCGAAGAGGAGGGAAC
ATATTATATACAGAAGAAGAACAAGAGACGTGCCGCATGTCGCTAAGCCATCGGAAGGGA
TGCTCAGAAAATGGCACAGTATCACATTACAGTTCGGTTGATTTCGT
```
